# Supplementary material for: Intermolecular interactions in the crystal structures of substituted tetrazolones
Source: Royal Society of Chemistry journal article supplement (doi:10.1039/b823041b), 2009-01-01

## Supplementary Information

### **Intermolecular interactions in the crystal structures of substituted tetrazolones**

Sundeep Rayat,\* Olajide Alawode and John Desper

*Department of Chemistry, Kansas State University, 213 CBC Building, Manhattan, KS 66506 - 0401, USA.*

*E-mail: [sundeep@ksu.edu](mailto:sundeep@ksu.edu); Fax: 785-532-6666; Tel:785-532-6660*

**Proton NMR spectrum of 1-(3-methoxyphenyl)-4-methyl-1*H*-tetrazol-5(4*H*)-one in DMSO-  
d<sub>6</sub> (3a)**

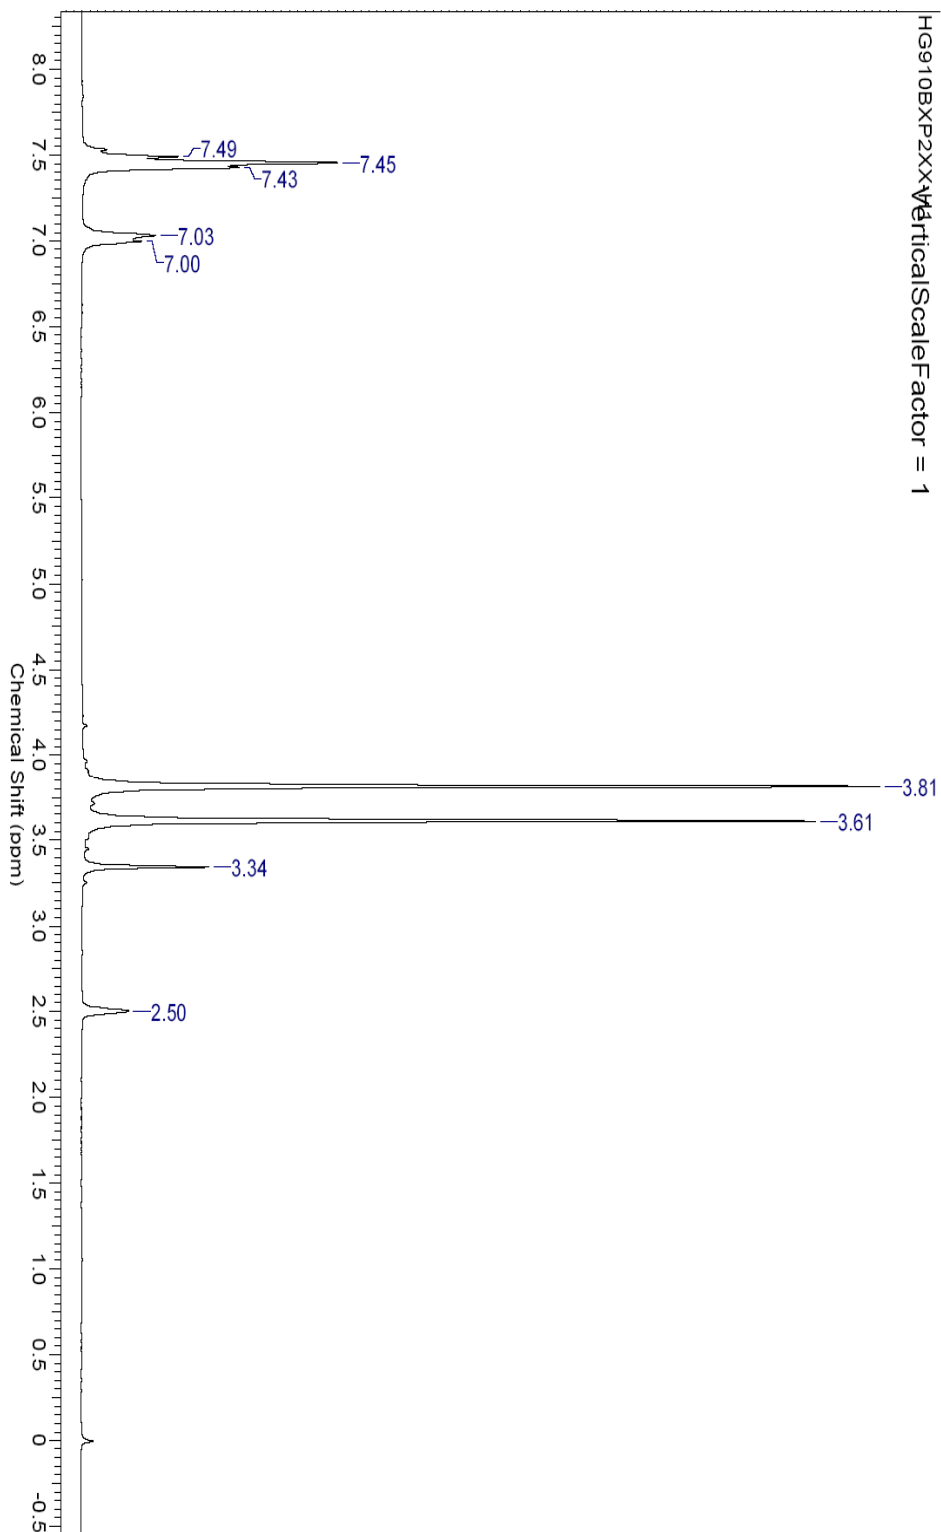

**Carbon NMR spectrum of 1-(3-methoxyphenyl)-4-methyl-1*H*-tetrazol-5(4*H*)-one in DMSO-  
d<sub>6</sub> (3a)**

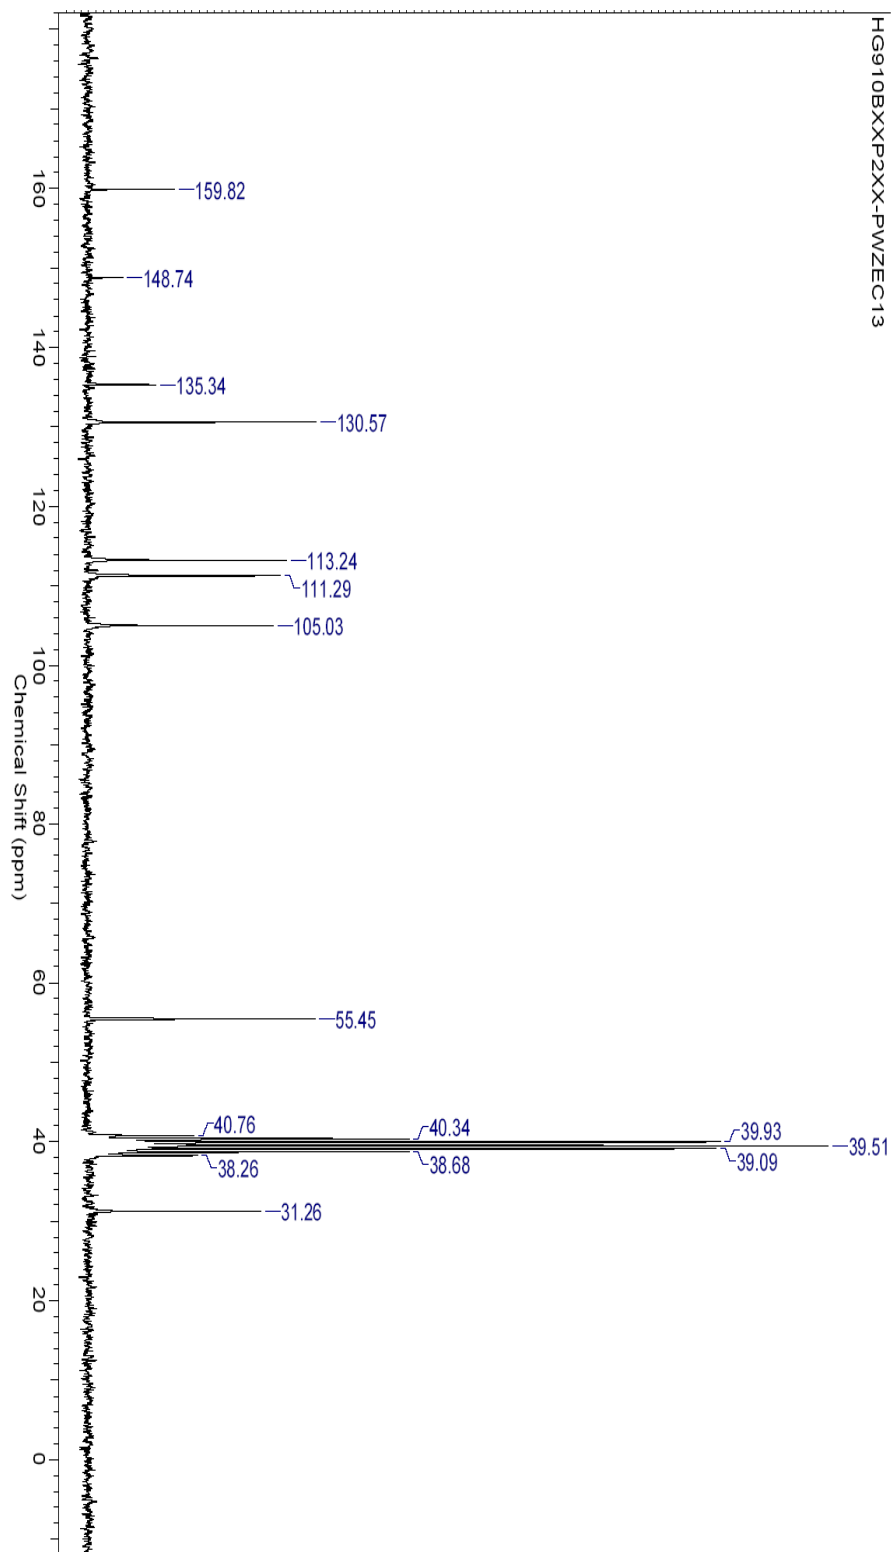

Supplement: b823041b.pdf [file b823041b.pdf]
